# Supplementary material for: Shorter versus longer corticosteroid duration and recurrent immune checkpoint inhibitor-associated AKI
Source: PubMed Central journal article supplement — J Immunother Cancer. 2022 Sep 22;10(9):e005646. doi: 10.1136/jitc-2022-005646 (PMC9511654; doi:10.1136/jitc-2022-005646), 2022-09-22
Supplement: jitc-2022-005646supp001.pdf [file jitc-2022-005646supp001.pdf]

## **Supplementary Appendix**

Shorter versus Longer Corticosteroid Duration and Recurrent Immune Checkpoint Inhibitor-Associated AKI

[Table of Contents](#)**ICPi-AKI Consortium Investigators****Supplemental Tables**

Table S1. Criteria for ICPi-AKI

Table S2. Kidney Disease: Improving Global Outcomes (KDIGO) Criteria for Acute Kidney Injury

Table S3. Characteristics of Patients with and without Recurrent ICPi-AKI or Death

**Supplemental Figure**

Figure S1. Distribution of Corticosteroid Treatment Duration in Patients with ICPi-AKI

**References**

**ICPi-AKI Consortium Investigators**

**Assistance Publique-Hôpitaux de Paris (AP-HP), Sorbonne Université, Hôpital Pitié-Salpêtrière:** Luca Campedel, Joe-Elie Salem, Corinne Isnard Bagnis

**Brigham and Women's Hospital/Dana-Farber Cancer Institute:** Shruti Gupta, David E. Leaf, Harkarandeep Singh, Shveta S. Motwani, Naoka Murakami, Maria C. Tio, Suraj S. Mothi, Umut Selamet

**Charité – Universitätsmedizin Berlin:** Sebastian Loew, Kai M. Schmidt-Ott

**Chi-Mei Medical Center:** Weiting Chang

**Donald and Barbara Zucker School of Medicine:** Kenar D. Jhaveri, Rimda Wanchoo, Yuriy Khanin, Jamie S. Hirsch, Vipulbhai Sakhiya, Daniel Stalbow, Sylvia Wu

**Duke University Medical Center:** David I. Ortiz-Melo

**Guy's and St. Thomas NHS Hospital:** Marlies Ostermann, Nuttha Lumlertgul, Nina Seylanova, Armando Cennamo, Anne Rigg, Nisha Shaunak

**Harvard Medical School:** Zoe A. Kibbelaar

**Heidelberg University Hospital:** Karolina Benesova

**Icahn School of Medicine at Mount Sinai Hospital:** Priya Deshpande

**Massachusetts General Hospital:** Meghan E. Sise, Kerry L. Reynolds, Harish S. Seethapathy, Meghan Lee, Ian A. Strohhnen

**Mayo Clinic:** Sandra M. Herrmann, Busra Isik

**Memorial Sloan Kettering Cancer Center:** Ilya G. Glezerman

**New York Nephrology Vasculitis and Glomerular Center:** Frank B. Cortazar

**Northwestern University:** Vikram Aggarwal, Sunandana Chandra

**Ohio State University:** Jason M. Prosek, Sethu M. Madhavan, Dwight H. Owen, Marium Husain

**Sheba Medical Center:** Pazit Beckerman, Sharon Mini

**Stanford University School of Medicine:** Shuchi Anand, Pablo Garcia, Aydin Kaghazchi

**University of Alabama at Birmingham:** Sunil Rangarajan

**University of California-Los Angeles:** Daniel Sanghoon Shin, Grace Cherry

**University of California-San Francisco:** Christopher A. Carlos, Raymond K. Hsu, Andrey Kisel

**University Hospitals Cleveland Medical Center:** Arash Rashidi, Sheru K. Kansal, Nicole Albert, Katherine Carter, Vicki Donley, Tricia Young, Heather Cigoi

**University Hospital of Geneva:** Sophie De Seigneux, Thibaud Koessler

**University Hospitals Leuven:** Ben Sprangers, Els Wauters

**University of Florida:** Chintan V. Shah

**University Medical Center Groningen:** Mark Eijgelsheim

**University of Miami Miller School of Medicine:** Zain Mithani, Javier A. Pagan

**University of Pennsylvania Health System:** Gaia Coppock, Jonathan J. Hogan

**University of Texas MD Anderson Cancer Center:** Ala Abudayyeh, Omar Mamlouk, Jamie S. Lin, Valda Page

**University of Toronto:** Abhijat Kitchlu

**University of Vermont Larner College of Medicine:** Samuel AP Short

**University of Virginia Health System:** Amanda D. Renaghan, Elizabeth M. Gaughan

**University of Washington:** A. Bilal Malik

**Vall d'Hebron University Hospital:** Maria Jose Soler, Clara García-Carro, Sheila Bermejo, Enriqueta Felip, Eva Muñoz-Couselo, Maria Josep Carreras

**Table S1: Criteria for ICPI-AKI**

---

**AKI that was directly attributed to the ICPI by the treating provider AND either of the following criteria:**

---

**Criteria 1:** Increase in SCr  $\geq$  100% from baseline OR treatment with KRT

**Criteria 2:** Increase in SCr  $\geq$ 50% from baseline AND at least one of the following:

- 1) ATIN on biopsy
  - 2) ICPI held for at least one cycle due to concern for ICPI-AKI
  - 3) Treatment with corticosteroids due to concern for ICPI-AKI
- 

Abbreviations: AKI, acute kidney injury; ATIN, acute tubulointerstitial nephritis; ICPI, immune checkpoint inhibitor; KRT, kidney replacement therapy; SCr, serum creatinine.

**Table S2: Kidney Disease: Improving Global Outcomes (KDIGO) Criteria for Acute Kidney Injury**

| <b>Stage of AKI</b> | <b>Serum Creatinine</b>        |
|---------------------|--------------------------------|
| Stage 1             | 1.5-1.9x baseline              |
| Stage 2             | 2-2.9x baseline                |
| Stage 3             | ≥3x baseline OR receipt of KRT |

Abbreviations: KRT, kidney replacement therapy. Data on urine output were not available and were therefore not considered as part of AKI staging. Based on the KDIGO criteria.<sup>1</sup>

**Table S3. Characteristics of Patients with and without Recurrent ICPI-AKI or Death**

| Variable                                                   | Recurrent ICPI-AKI or Death<br>(n=17) | No Recurrent ICPI-AKI or Death<br>(n=148) | P Value |
|------------------------------------------------------------|---------------------------------------|-------------------------------------------|---------|
| Age at ICPI initiation, yrs, median (IQR)                  | 75 (66-81)                            | 69 (60-75)                                | 0.08    |
| Male, n (%)                                                | 9 (52.9)                              | 96 (64.9)                                 | 0.43    |
| Race, n (%)                                                |                                       |                                           | 0.41    |
| White                                                      | 14 (82.4)                             | 128 (86.5)                                |         |
| Black                                                      | 0 (0)                                 | 7 (4.7)                                   |         |
| Other/Unknown                                              | 3 (17.7)                              | 13 (8.8)                                  |         |
| Comorbidities, n (%)                                       |                                       |                                           |         |
| Hypertension                                               | 11 (64.7)                             | 98 (66.2)                                 | 0.99    |
| Diabetes                                                   | 3 (17.7)                              | 29 (19.7)                                 | 0.99    |
| CHF                                                        | 1 (5.9)                               | 6 (4.1)                                   | 0.54    |
| COPD                                                       | 2 (11.8)                              | 15 (10.1)                                 | 0.69    |
| Cirrhosis                                                  | 0 (0)                                 | 1 (0.7)                                   | 0.99    |
| Body mass index, median (IQR)                              | 29 (24-29)                            | 27 (24-31)                                | 0.90    |
| Baseline eGFR, <sup>1</sup> ml/min per 1.73 m <sup>2</sup> |                                       |                                           |         |
| Median (IQR)                                               | 65 (52-77)                            | 73 (60-87)                                | 0.11    |
| eGFR Categories, n (%)                                     |                                       |                                           | 0.31    |
| ≥90                                                        | 2 (11.8)                              | 30 (20.3)                                 |         |
| 60-89                                                      | 10 (58.8)                             | 80 (54.1)                                 |         |
| 45-59                                                      | 1 (5.9)                               | 20 (13.5)                                 |         |
| <45                                                        | 4 (23.5)                              | 18 (12.2)                                 |         |
| Extrarenal irAE, <sup>2</sup> n (%)                        | 10 (58.8)                             | 73 (49.3)                                 | 0.61    |
| Malignancy, n (%)                                          |                                       |                                           | 0.42    |
| Lung                                                       | 5 (29.4)                              | 35 (23.7)                                 |         |
| Melanoma                                                   | 4 (23.5)                              | 41 (27.7)                                 |         |
| Genitourinary                                              | 7 (41.2)                              | 42 (28.4)                                 |         |
| Other                                                      | 1 (5.9)                               | 30 (20.3)                                 |         |
| PPI, <sup>3</sup> n (%)                                    | 9 (52.9)                              | 86 (58.1)                                 | 0.80    |
| Combo anti-CTLA-4 + anti-PD-1/ PD-L1                       | 4 (23.5)                              | 38 (25.7)                                 | 0.99    |
| ICPI-AKI stage, <sup>4</sup> n (%)                         |                                       |                                           | 0.41    |
| Stage 1                                                    | 4 (23.5)                              | 15 (10.1)                                 |         |
| Stage 2                                                    | 4 (23.5)                              | 53 (35.8)                                 |         |
| Stage 3                                                    | 9 (52.9)                              | 80 (54.1)                                 |         |
| KRT, n (%)                                                 | 2 (11.8)                              | 7 (4.7)                                   | 0.23    |
| Rechallenged after ICPI-AKI, n (%)                         | 1 (5.9)                               | 27 (18.2)                                 | 0.31    |

Data are shown as median (IQR) and n (%). Abbreviations: CHF, congestive heart failure; Combo, combination therapy; COPD, chronic obstructive pulmonary disease; CS, corticosteroids; CTLA-4, cytotoxic T lymphocyte-associated antigen 4; eGFR, estimated glomerular filtration rate; ICPI, immune checkpoint inhibitor; IQR, interquartile range; irAE, immune-related adverse event; KRT, kidney replacement therapy; PD-1, programmed cell death 1; PD-L1, programmed death-ligand 1; PPI, proton pump inhibitor; SCr, serum creatinine.

Categorical data were compared using Chi-squared or Fisher's exact test, as appropriate. Continuous data were compared using Student's t-test or Wilcoxon's rank sum test for normally distributed and skewed data, respectively.

<sup>1</sup>Baseline eGFR was defined based on the SCr value closest and prior to ICPI initiation, and was calculated based on Chronic Kidney Disease-Epidemiology Collaboration equation.<sup>2</sup>

<sup>2</sup>Extrarenal irAEs were assessed prior to (>14 days) or concomitant (within 14 days before or after) with initial ICPI-AKI diagnosis.

<sup>3</sup>PPIs were assessed in the 14 days preceding diagnosis of initial ICPI-AKI episode.

<sup>4</sup>AKI stage at initial episode of ICPI-AKI.

**Figure S1. Distribution of Corticosteroid Treatment Duration in Patients with ICPI-AKI.** Corticosteroid duration was defined as the number of days until they were tapered to a dose of prednisone  $\leq 10$ mg per day (or equivalent). This graph shows that 88% of patients treated with corticosteroids were tapered within 84 days.

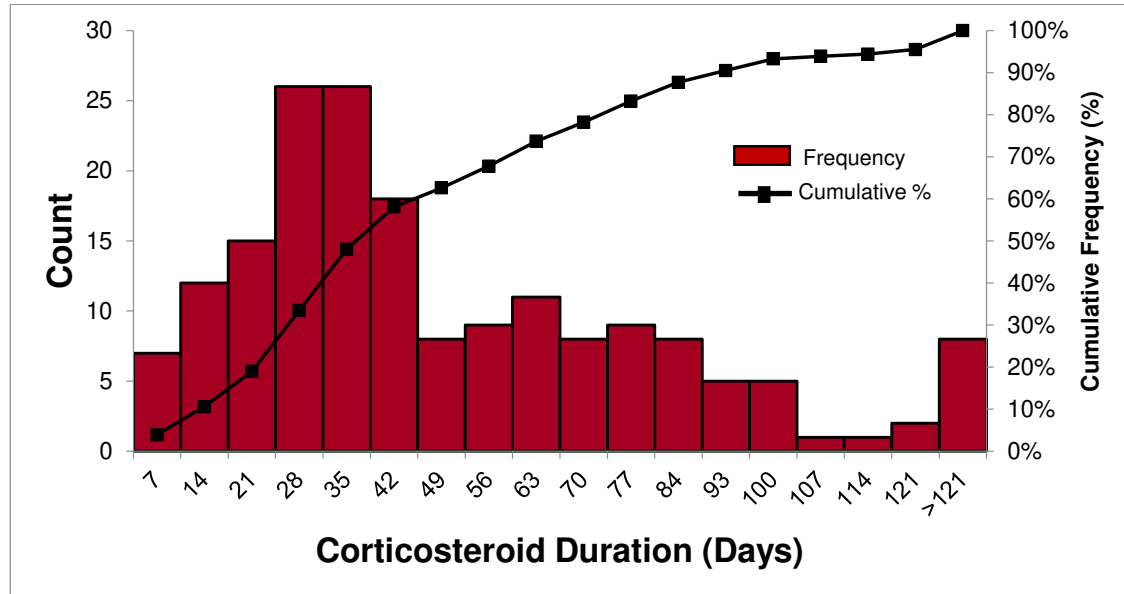



## References

1. Kellum JA, Lameire N, Aspelin P, et al. Kidney disease: Improving global outcomes (KDIGO) acute kidney injury work group. KDIGO clinical practice guideline for acute kidney injury. *Kidney Int Suppl.* 2012.
2. Levey AS, Stevens LA, Schmid CH, et al. A new equation to estimate glomerular filtration rate. *Ann Intern Med.* 2009;150(9):604-12.
